# Supplementary material for: Municipal wastewater monitoring revealed the predominance of bla GES genes with diverse variants among carbapenemase-producing organisms: high occurrence and persistence of Aeromonas caviae harboring the new bla GES variant bla GES-48
Source: PubMed Central journal article supplement (PMC10715227; doi:10.1128/spectrum.02188-23), 2023-10-09
Supplement: spectrum.02188-23-s0001.pdf [file spectrum.02188-23-s0001.pdf]

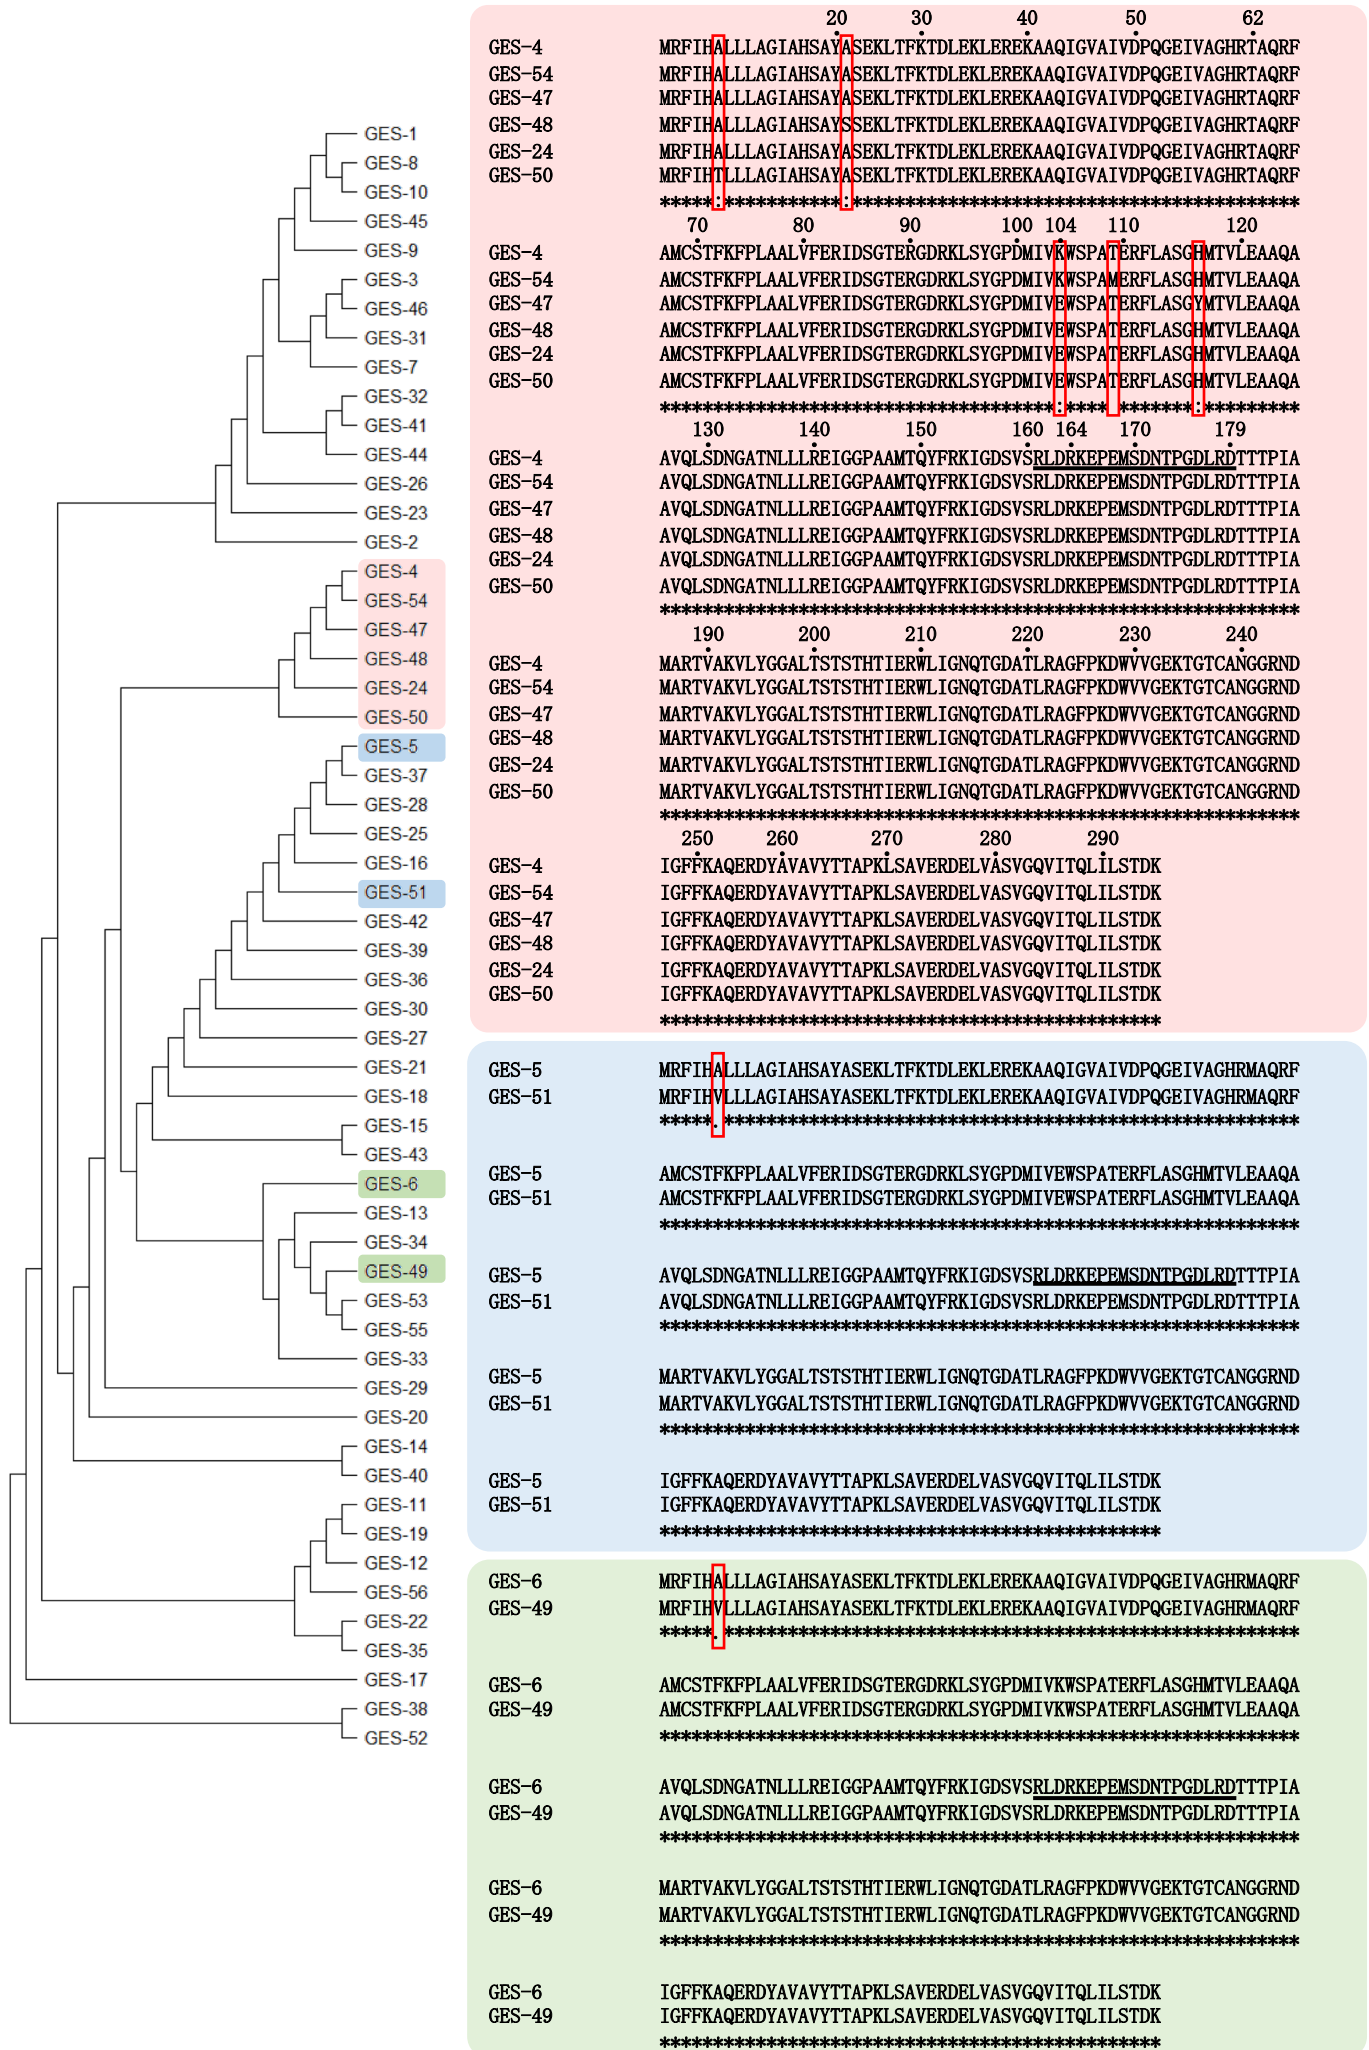

**Fig. S1.** Comparison of the amino acid sequence of GES-47, -48, -50, and -54, GES-51, and GES-49 to those of GES-4, -5, and -6, respectively. The amino acids of the omega loop are underlined.

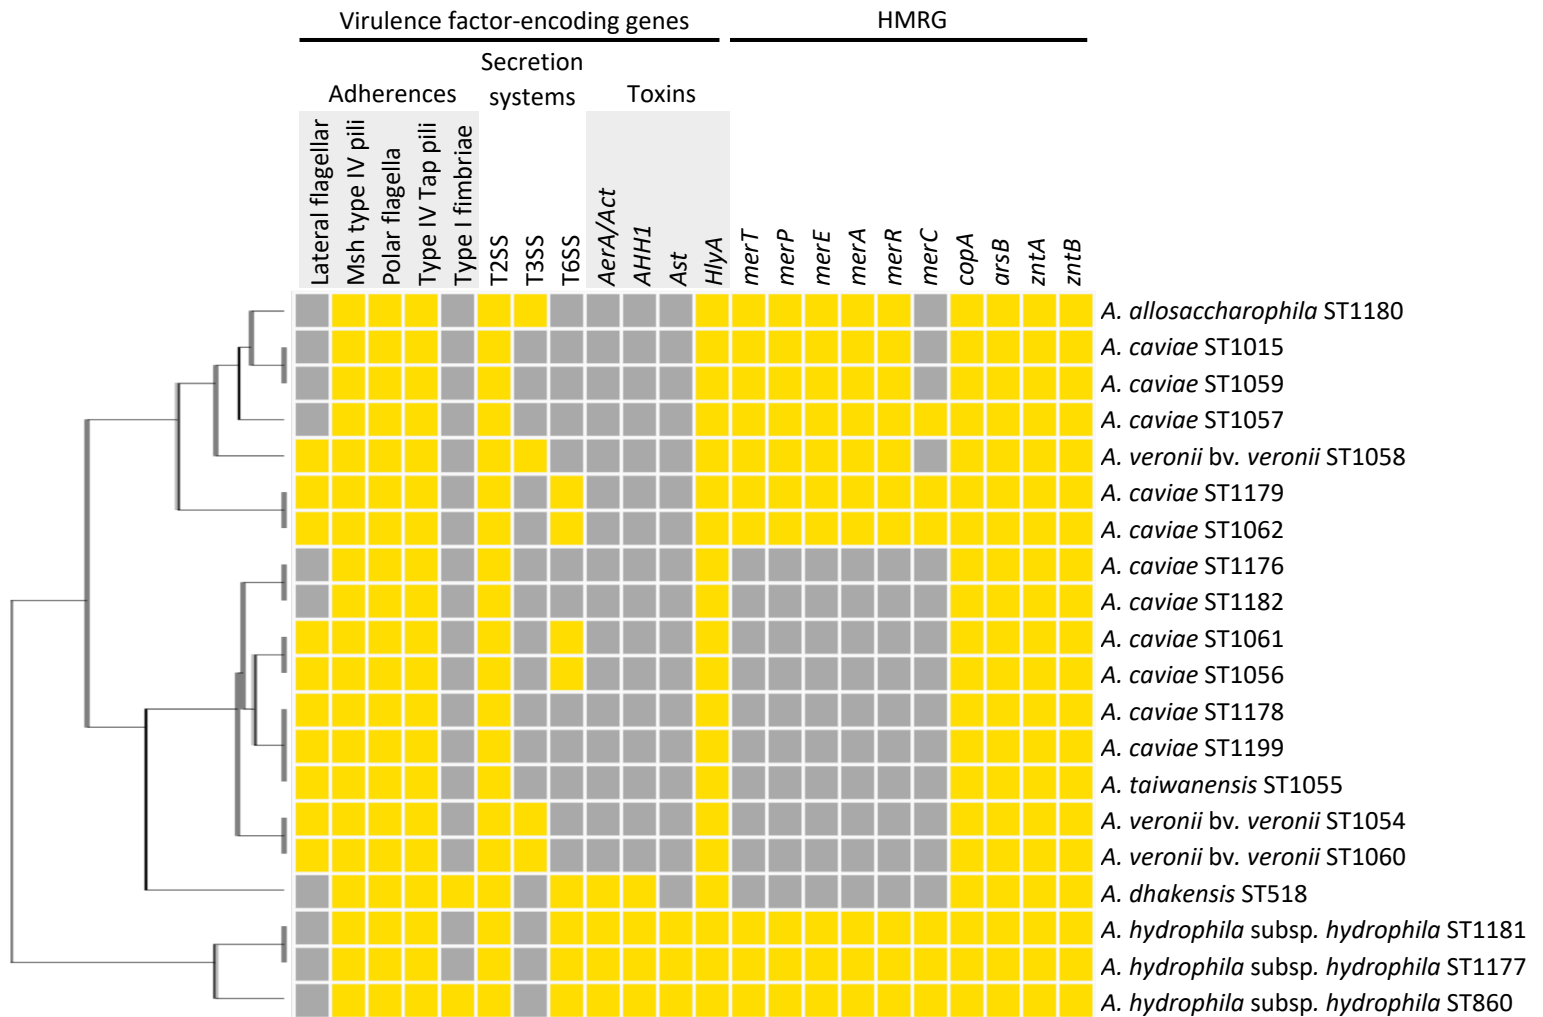

**Fig. S2.** Profiles of virulence factor-encoding genes and heavy metal resistance genes (HMRG) among 20 different lineage isolates of *Aeromonas* spp. Heat map, representing the presence (yellow) or absence (gray) of genes was generated using Morpheus software (<https://software.broadinstitute.org/morpheus/>).

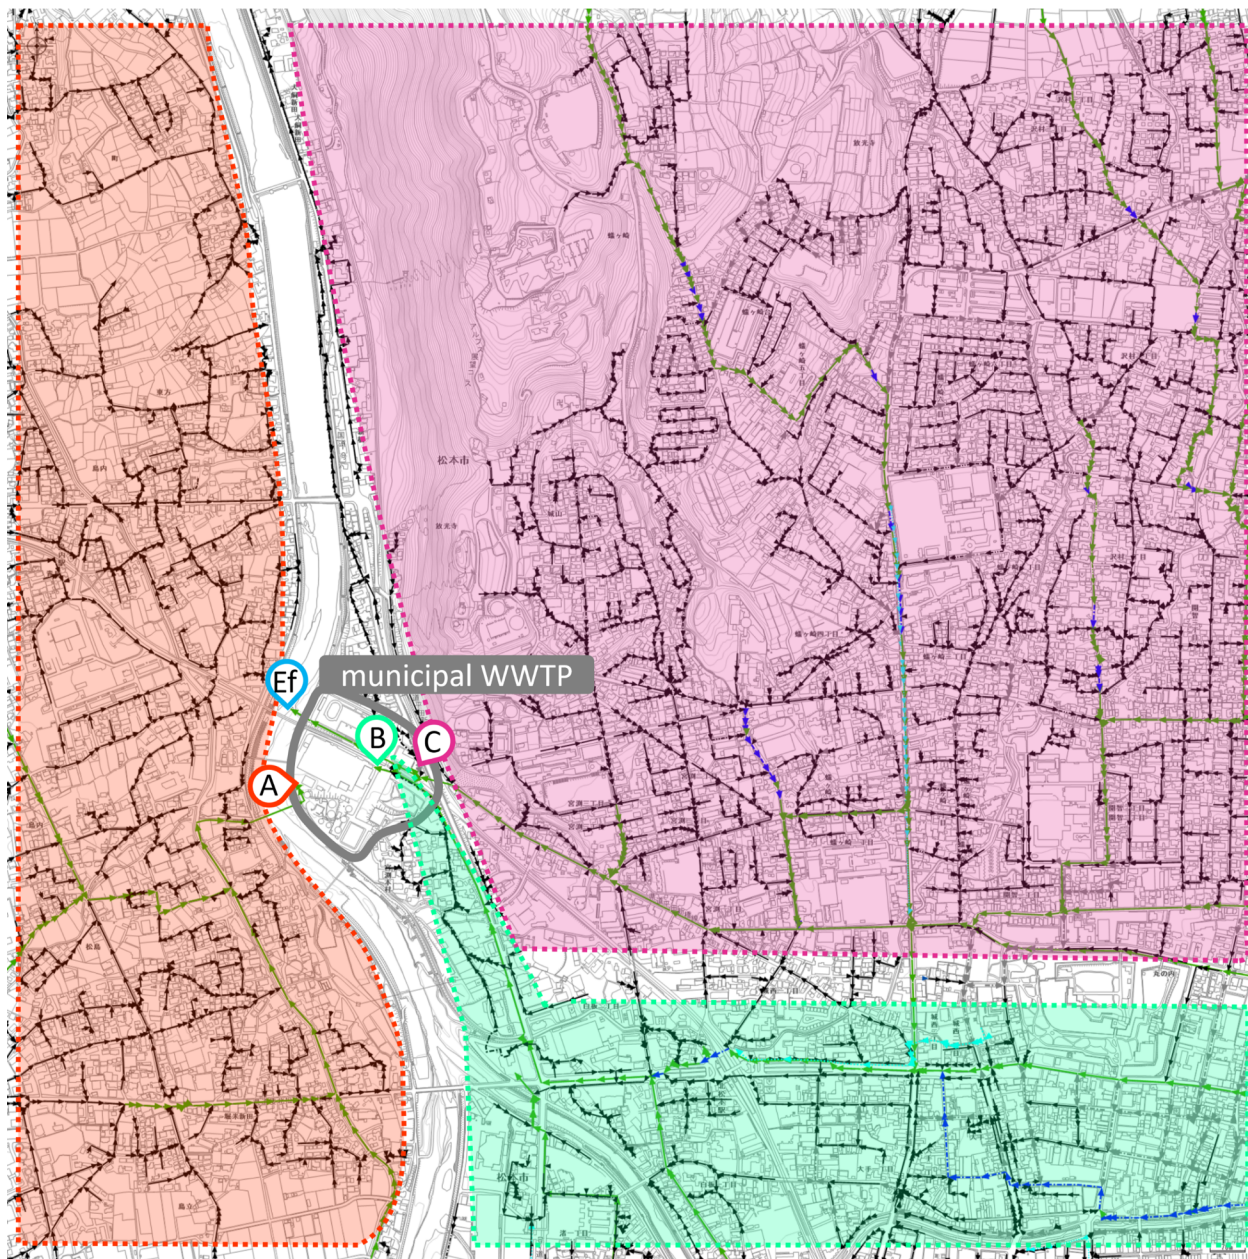

**Fig. S3.** Sampling points at the municipal wastewater treatment plant located in Matsumoto City, Nagano Prefecture, Japan. A, inlet A receiving separated sewer line in the western area of the city (orange); B, inlet B receiving combined sewer line in the southeastern area of the city (green); C, inlet C receiving combined sewer line in the northeastern area of the city (pink); Ef, effluent outlet.

**TABLE S1.** Measurement results of temperature and pH at sampling points

| Sample                                                          | Sampling point<br>(latitude/longitude)     | Parameter   | Sampling date (month/year) |        |        |        |        | Average $\pm$ SD |                |
|-----------------------------------------------------------------|--------------------------------------------|-------------|----------------------------|--------|--------|--------|--------|------------------|----------------|
|                                                                 |                                            |             | Dec-20                     | Feb-21 | Apr-21 | Jun-21 | Aug-21 |                  | Oct-21         |
| Influent A                                                      | Inlet A<br>(36°14'38.0"N<br>137°57'02.9"E) | Temperature | 16°C                       | 14°C   | 16°C   | 20°C   | 23°C   | 22°C             | 18.5 $\pm$ 3.4 |
|                                                                 |                                            | pH          | 7.53                       | 7.55   | 7.51   | 7.31   | 7.23   | 7.29             | 7.4 $\pm$ 0.1  |
| Influent B                                                      | Inlet B<br>(36°24'30.3"N<br>137°95'21.0"E) | Temperature | 17°C                       | 13°C   | 17°C   | 20°C   | 22°C   | 21°C             | 18.3 $\pm$ 3.0 |
|                                                                 |                                            | pH          | 7.47                       | 7.41   | 7.29   | 7.36   | 7.37   | 7.06             | 7.3 $\pm$ 0.1  |
| Influent C                                                      | Inlet C<br>(36°14'35.2"N<br>137°57'12.0"E) | Temperature | 18°C                       | 13°C   | 18°C   | 21°C   | 24°C   | 23°C             | 19.5 $\pm$ 3.7 |
|                                                                 |                                            | pH          | 7.53                       | 7.29   | 7.28   | 7.09   | 7.19   | 7.17             | 7.3 $\pm$ 0.1  |
| Effluent                                                        | 36°14'38.0"N<br>137°57'02.9"E              | Temperature | 17°C                       | 14°C   | 18°C   | 21°C   | 25°C   | 22°C             | 19.5 $\pm$ 3.6 |
|                                                                 |                                            | pH          | 7.22                       | 6.84   | 6.95   | 6.71   | 7.01   | 7.06             | 7.0 $\pm$ 0.2  |
| River water<br>(1.35 km upstream from<br>the effluent outlet)   | 36°13'54.7"N<br>137°57'11.0"E              | Temperature | 11°C                       | 9°C    | 10°C   | 17°C   | 18°C   | 15°C             | 13.3 $\pm$ 3.5 |
|                                                                 |                                            | pH          | 7.6                        | 7.4    | 8.1    | 5.9    | 7      | 6                | 7.0 $\pm$ 0.8  |
| River water<br>(0.56 km downstream from<br>the effluent outlet) | 36°14'56.0"N<br>137°57'04.7"E              | Temperature | 11°C                       | 9°C    | 11°C   | 17°C   | 19°C   | 16°C             | 13.8 $\pm$ 3.7 |
|                                                                 |                                            | pH          | 7.4                        | 7.2    | 7.8    | 6      | 6.8    | 6                | 6.9 $\pm$ 0.7  |

TABLE S2. Minimum inhibitory concentrations (MICs) of 25 antimicrobials against 75 CPOs in this study

| Bacterial species                                    | Strain | Sequence types | Carbapenemases | Others         | MIC (μg/mL) |              |       |       |             |           |             |          |             |             |             |             |             |             |             |             |             |             |             |             |             |             |             |     |  |
|------------------------------------------------------|--------|----------------|----------------|----------------|-------------|--------------|-------|-------|-------------|-----------|-------------|----------|-------------|-------------|-------------|-------------|-------------|-------------|-------------|-------------|-------------|-------------|-------------|-------------|-------------|-------------|-------------|-----|--|
|                                                      |        |                |                |                | Ampicillin  | Piperacillin | β-LAM | TZP   | Ceftazidime | Ceftiofur | Ceftazidime | Cefepime | Ceftazidime | Ceftazidime | Ceftazidime | Ceftazidime | Ceftazidime | Ceftazidime | Ceftazidime | Ceftazidime | Ceftazidime | Ceftazidime | Ceftazidime | Ceftazidime | Ceftazidime | Ceftazidime | Ceftazidime |     |  |
| <i>Aeromonas</i>                                     | 10CC9  | 1180           | GES-24         | TEM-1B         | >16         | >64          | >16-8 | 64-4  | >16         | >4        | 4           | >4       | >4          | 16          | 8           | 8           | 16          | >16         | 2           | 4           | >64         | 16          | 4           | 8           | 32          | >9.5-0.5    | 8           | 0.5 |  |
|                                                      | 4C99   | 057            | GES-5          |                | >16         | >64          | >16-8 | 32-4  | >16         | >4        | 8           | >4       | 8           | >4          | 8           | >4          | >32         | >16         | 2           | 0.5         | 0.5         | 32          | 16          | 4           | 32          | >38-2       | >0.25       | 0.5 |  |
| <i>Aeromonas</i>                                     | 6B8C   | 1178           | GES-5          | MOX            | >16         | >64          | >16-8 | >64-4 | >16         | >4        | 16          | >4       | 16          | 32          | >16         | >32         | >16         | 16          | 0.5         | 1           | 32          | 16          | 4           | 32          | >9.5-0.5    | 1           | 0.5         |     |  |
|                                                      | 6CC6   | 1178           | GES-5          | MOX            | >16         | >64          | >16-8 | 64-4  | >16         | >4        | 8           | >4       | 16          | >16         | >32         | >16         | 8           | >4          | 16          | 8           | 2           | 4           | 16          | 8           | 32          | >38-2       | 0.5         | 2   |  |
| <i>Aeromonas</i>                                     | 10B8C  | 1059           | GES-5          | MOX+VEB-1      | >16         | 32           | >16-8 | 8-4   | >16         | >4        | >16         | >4       | >16         | >4          | >32         | 8           | >32         | >16         | >16         | 0.5         | 0.5         | 16          | 2           | 32          | >38-2       | >0.25       | 1           |     |  |
|                                                      | 2CC7   | 1059           | GES-5          | MOX+VEB-1      | >16         | >64          | >16-8 | >64-4 | >16         | >4        | >16         | >4       | >16         | >4          | >32         | >16         | >32         | >16         | >16         | 4           | 4           | 32          | 32          | 32          | >38-2       | 0.5         | 2           |     |  |
| <i>Aeromonas</i>                                     | 4CC12  | 1059           | GES-5          | MOX+VEB-1      | >16         | 64           | >16-8 | 32-4  | >16         | >4        | >16         | >4       | >16         | >4          | >32         | >16         | >32         | >16         | >16         | 4           | 4           | 16          | 16          | 4           | >38-2       | >0.25       | >0.25       |     |  |
|                                                      | 10CC10 | 1176           | GES-5          | MOX+VEB-1      | >16         | 64           | >16-8 | 16-4  | >16         | >4        | >16         | >4       | >16         | >4          | >32         | >16         | >32         | >16         | >16         | 1           | 2           | 16          | 4           | 32          | >38-2       | >0.25       | 0.5         |     |  |
| <i>Aeromonas</i>                                     | 6BC6   | 1199           | GES-24         |                | >16         | 32           | >16-8 | >4-4  | >16         | >4        | 4           | 4        | 4           | 4           | 4           | 4           | 4           | 4           | 4           | 4           | 4           | 4           | 4           | 4           | >38-2       | 1           | 2           |     |  |
|                                                      | 10BC6  | 1179           | GES-24         |                | >16         | >64          | >16-8 | 64-4  | >16         | >4        | 16          | >4       | 16          | >4          | 32          | >16         | >32         | >16         | 0.5         | 0.5         | 0.25        | 32          | 2           | 32          | >38-2       | 1           | 8           |     |  |
| <i>Aeromonas</i>                                     | 6CC5   | 1062           | GES-24, IMP-1  |                | >16         | >64          | >16-8 | 32-4  | >16         | >4        | >16         | >4       | >16         | >4          | >32         | >16         | >32         | >16         | 4           | >8          | >64         | 32          | 8           | 32          | >38-2       | 0.5         | 1           |     |  |
|                                                      | 2BC3   | 1056           | GES-48         |                | >16         | 16           | >16-8 | 8-4   | >16         | >4        | 4           | 4        | 4           | 4           | 4           | 4           | 4           | 4           | 4           | 4           | 4           | 4           | 4           | 4           | >9.5-0.5    | 1           | 0.5         |     |  |
| <i>Aeromonas</i>                                     | 4BC2   | 1056           | GES-48         |                | >16         | >64          | >16-8 | 32-4  | >16         | >4        | 16          | >4       | 16          | >4          | >32         | >16         | >32         | >16         | 1           | 0.25        | 32          | 1           | 32          | 8           | >9.5-0.5    | 0.5         | 0.5         |     |  |
|                                                      | 6BC4   | 1056           | GES-48         |                | >16         | >64          | >16-8 | 16-4  | >16         | >4        | 8           | >4       | 32          | >4          | 32          | >4          | 32          | >4          | 0.5         | 0.5         | 32          | 2           | 32          | 8           | >9.5-0.5    | 0.5         | 0.5         |     |  |
| <i>Aeromonas</i>                                     | 8BC3   | 1056           | GES-48         |                | >16         | 64           | >16-8 | 16-4  | >16         | >4        | 4           | 4        | 4           | 4           | 4           | 4           | 4           | 4           | 4           | 4           | 4           | 4           | 4           | 4           | >38-2       | 4           | 2           |     |  |
|                                                      | 10BC4  | 1056           | GES-48         |                | >16         | 64           | >16-8 | 16-4  | >16         | >4        | 8           | >4       | 32          | >4          | 32          | >4          | 32          | >4          | 0.5         | 0.5         | 32          | 16          | 16          | 16          | >38-2       | 4           | 4           |     |  |
| <i>Aeromonas</i>                                     | 2CC8   | 1056           | GES-48         |                | >16         | 16           | >16-8 | 16-4  | >16         | >4        | 8           | >4       | 16          | >4          | 16          | >4          | 16          | >4          | >32         | >16         | >0.25       | 0.5         | 32          | 2           | >64         | 19-1        | 1           |     |  |
|                                                      | 4CC5   | 1056           | GES-48         |                | >16         | 16           | >16-8 | 16-4  | >16         | >4        | 4           | 4        | 4           | 4           | 4           | 4           | 4           | 4           | 4           | 4           | 4           | 4           | 4           | 4           | >38-2       | 2           | 1           |     |  |
| <i>Aeromonas</i>                                     | 6CC12  | 1056           | GES-48         |                | >16         | >64          | >16-8 | 32-4  | >16         | >4        | 4           | 4        | 4           | 4           | 4           | 4           | 4           | 4           | 4           | 4           | 4           | 4           | 4           | 4           | >9.5-0.5    | 1           | 0.5         |     |  |
|                                                      | 8CC4   | 1182           | GES-48         |                | >16         | >64          | >16-8 | 32-4  | >16         | >4        | >16         | >4       | >16         | >4          | >32         | >16         | >32         | >16         | 4           | >0.25       | 0.25        | 16          | 4           | 16          | >38-2       | 0.5         | 1           |     |  |
| <i>Aeromonas</i>                                     | 10CC8  | 1056           | GES-48         |                | >16         | 32           | >16-8 | 16-4  | >16         | >4        | 4           | 4        | 4           | 4           | 4           | 4           | 4           | 4           | 4           | 4           | 4           | 4           | 4           | 4           | >9.5-0.5    | 0.5         | 2           |     |  |
|                                                      | 6BC7   | 1061           | IMP-10         |                | >16         | 8            | >16-8 | >4-4  | >16         | >4        | >16         | >4       | >16         | >4          | >32         | >16         | >32         | >16         | 2           | >8          | >64         | >64         | 4           | 2           | >38-2       | 0.5         | 4           |     |  |
| <i>Aeromonas</i>                                     | 12BC1  | 1015           | GES-5          |                | >16         | 32           | >16-8 | 32-4  | >16         | >4        | 8           | >4       | 16          | >4          | 32          | >16         | >32         | >16         | 1           | 2           | 32          | 4           | 32          | 8           | >9.5-0.5    | 0.5         | 2           |     |  |
|                                                      | 8BC4   | 1015           | GES-5          |                | >16         | >64          | >16-8 | 64-4  | >16         | >4        | 16          | >4       | 16          | >4          | 32          | >16         | >32         | >16         | 1           | 4           | 16          | 8           | 8           | 4           | >9.5-0.5    | >0.25       | 8           |     |  |
| <i>Aeromonas</i>                                     | 10BC1  | 1015           | GES-5          |                | >16         | >64          | >16-8 | 64-4  | >16         | >4        | >16         | >4       | >16         | >4          | 32          | >16         | >32         | >16         | 1           | 4           | 64          | 8           | 8           | 4           | >9.5-0.5    | >2          | 4           |     |  |
|                                                      | 6CC8   | 1182           | GES-6          |                | >16         | >64          | >16-8 | 16-4  | >16         | >4        | >16         | >4       | >16         | >4          | >32         | >16         | >32         | >16         | 2           | 2           | 32          | 32          | 8           | 4           | >9.5-0.5    | 0.5         | >0.25       |     |  |
| <i>Aeromonas</i>                                     | 10CC4  | 518            | GES-24         |                | >16         | 16           | >16-8 | 8-4   | >16         | >4        | 4           | >4       | >4          | >4          | >32         | >16         | >32         | >16         | 8           | 4           | 4           | >64         | 64          | 4           | >38-2       | >64         | 4           |     |  |
| <i>Aeromonas hydrophila</i> subsp. <i>hydrophila</i> | 8CC6   | 1177           | GES-24         |                | >16         | >64          | >16-8 | 32-4  | >16         | >4        | 16          | >4       | 32          | >4          | 32          | >16         | >32         | >16         | >8          | >8          | >64         | >64         | 4           | 2           | >38-2       | 8           | 4           |     |  |
|                                                      | 8CC5   | 860            | GES-24, IMP-1  |                | >16         | >64          | >16-8 | >64-4 | >16         | >4        | >16         | >4       | >16         | >4          | >32         | >16         | >32         | >16         | 4           | 4           | >8          | >64         | >64         | 4           | >38-2       | 8           | 4           |     |  |
| <i>Aeromonas</i>                                     | 6CC13  | 1181           | GES-5          |                | >16         | >64          | >16-8 | 64-4  | >16         | >4        | 8           | >4       | 8           | >4          | >16         | >32         | >16         | >32         | >16         | >8          | 8           | >64         | >64         | 4           | >38-2       | >64         | 2           |     |  |
| <i>Aeromonas taiwanensis</i>                         | 2BC2   | 1055           | GES-5          |                | >16         | 32           | >16-8 | 16-4  | >16         | >4        | 16          | >4       | 16          | >4          | 16          | >4          | 32          | >16         | >0.25       | >0.12       | 64          | 2           | 32          | 8           | >9.5-0.5    | 1           | 0.5         |     |  |
|                                                      | 4BC3   | 1055           | GES-5          |                | >16         | >64          | >16-8 | 64-4  | >16         | >4        | 16          | >4       | 16          | >4          | 32          | >16         | >32         | >16         | 4           | 2           | 2           | >64         | 8           | 4           | >9.5-0.5    | 0.5         | 1           |     |  |
| <i>Aeromonas veronii</i> bv. <i>veronii</i>          | 12BC2  | 1054           | GES-5          |                | >16         | 32           | >16-8 | >4-4  | >16         | >4        | 2           | 4        | 2           | 2           | 2           | 2           | 2           | 2           | 2           | 2           | 2           | 2           | 2           | 2           | >38-2       | 0.5         | 1           |     |  |
|                                                      | 2BC1   | 1054           | GES-5          |                | >16         | 16           | >16-8 | >4-4  | >16         | >4        | 2           | 2        | 2           | 2           | 2           | 2           | 2           | 2           | 2           | 2           | 2           | 2           | 2           | 2           | >38-2       | 2           | 2           |     |  |
| <i>Aeromonas</i>                                     | 2CC6   | 1058           | GES-24         |                | >16         | 64           | >16-8 | 8-4   | >16         | >4        | 4           | 4        | 4           | 4           | 4           | 4           | 4           | 4           | 4           | 4           | 4           | 4           | 4           | 4           | >38-2       | 2           | 0.5         |     |  |
|                                                      | 6BC9   | 1060           | GES-49         |                | >16         | >64          | >16-8 | >64-4 | >16         | >4        | >16         | >4       | >16         | >4          | 16          | >4          | 32          | >16         | 2           | 1           | >64         | 32          | 8           | 4           | >38-2       | 1           | 4           |     |  |
| <i>Kluyvera cryocrescens</i>                         | 6BC3   | -              | GES-6          |                | >16         | 64           | >16-8 | 16-4  | >16         | >4        | 16          | >4       | 4           | 4           | 4           | 4           | 4           | 4           | 4           | 4           | 4           | 4           | 4           | 4           | >9.5-0.5    | 0.5         | 1           |     |  |
| <i>Citrobacter</i>                                   | 8BC2   | 110            | GES-5          |                | >16         | 16           | >16-8 | 8-4   | >16         | >4        | 2           | >4       | 2           | >4          | 2           | >4          | 2           | >4          | 2           | >4          | 2           | >4          | 2           | 2           | >9.5-0.5    | 1           | 1           |     |  |
| <i>Citrobacter braakii</i>                           | 4CC11  | 22             | GES-24         | CTX-M-3+TEM-1B | >16         | >64          | >16-8 | >64-4 | >16         | >4        | >16         | >4       | >16         | >4          | >32         | >16         | >32         | >16         | 16          | 8           | 1           | 32          | 1           | >8          | >38-2       | >0.25       | 1           |     |  |
|                                                      | 2CC2   | 116            | IMP-1          | CTX-M-3+TEM-1B | >16         | >64          | >16-8 | 16-4  | >16         | >4        | >16         | >4       | >16         | >4          | >32         | >16         | >32         | >16         | >16         | 4           | 8           | >64         | 32          | >8          | >9.5-0.5    | 4           | 0.5         |     |  |
| <i>Citrobacter</i>                                   | 12CC1  | 116            | IMP-1          | CTX-M-3+TEM-1B | >16         | >64          | >16-8 | 8-4   | >16         | >4        | >16         | >4       | >16         | >4          | >32         | >16         | >32         | >16         | 16          | 4           | 8           | >64         | 32          | >8          | >9.5-0.5    | 1           | 0.5         |     |  |
| <i>Citrobacter portucalensis</i>                     | 10C7   | 166            | GES-51         |                | >16         | 64           | >16-8 | 16-4  | >16         | >4        | 4           | >4       | 2           | >4          | 2           | >4          | 2           | >4          | 2           | >4          | 4           | 32          | 32          | 2           | >9.5-0.5    | >0.25       | 0.5         |     |  |
| <i>Enterobacter cloacae</i> subsp. <i>cloacae</i>    | 8BC1   | 1821           | GES-4          |                | >16         | 32           | >16-8 | >4-4  | >16         | >4        | 8           | 4        | 2           | >4          | 2           | >4          | 2           | >4          | 2           | >4          | 2           | >4          | 2           | 2           | >9.5-0.5    | 2           | 2           |     |  |
|                                                      | 10BC2  | 1821           | GES-4          |                | >16         | 32           | >16-8 | 8-4   | >16         | >4        | 16          | >4       | 2           | >4          | 2           | >4          | 2           | >4          | 2           | >4          | 2           | >4          | 2           | 2           | >9.5-0.5    | 1           | 1           |     |  |
| <i>Enterobacter kobei</i>                            | 6CC1   | 1822           | GES-4          |                | >16         | 16           | >16-8 | 8-4   | >16         | >4        | 8           | 4        | 2           | >4          | 2           | >4          | 2           | >4          | 2           | >4          | 2           | 8           | 4           | 32          | 8           | >9.5-0.5    | 32          | 2   |  |
| <i>Enterobacter</i>                                  | 6BC5   | 520            | GES-54         |                | >16         | 32           | >16-8 | 16-4  | >16         | >4        | 16          | >4       | 2           | >4          | 2           | >4          | 2           | >4          | 2           | >4          | 2           | 2           | 2           | 2           | >9.5-0.5    | >0.25       | 0.5         |     |  |
| <i>Enterobacter roggenkampii</i>                     | 4CC4   | 1059           | GES-4          |                | >16         | 32           | >16-8 |       |             |           |             |          |             |             |             |             |             |             |             |             |             |             |             |             |             |             |             |     |  |
